# Supplementary material for: Lipophilic Metabolites and Anatomical Acclimatization of Cleome amblyocarpa in the Drought and Extra-Water Areas of the Arid Desert of UAE
Source: PubMed Central journal article supplement (PMC6572330; doi:10.3390/plants8050132), 2019-05-16
Supplement: plants-08-00132-s001.pdf [file plants-08-00132-s001.pdf]

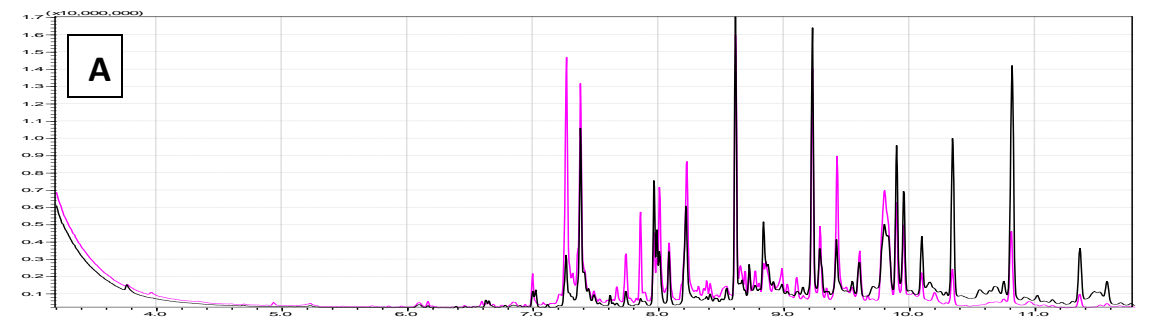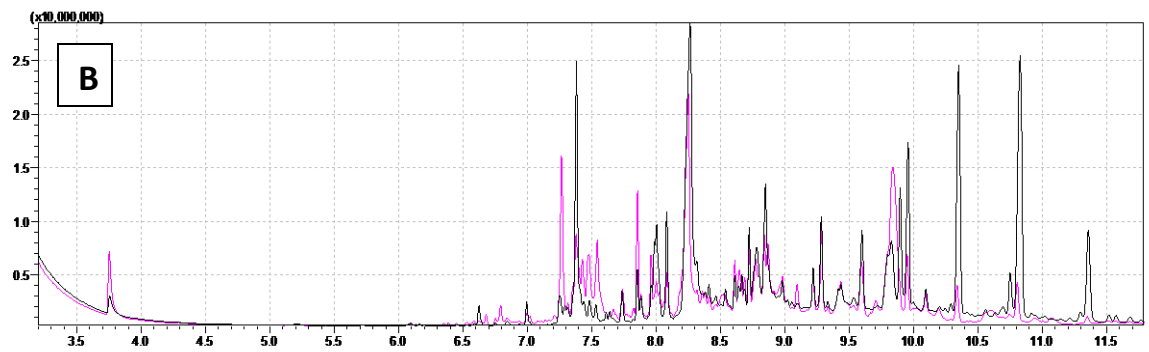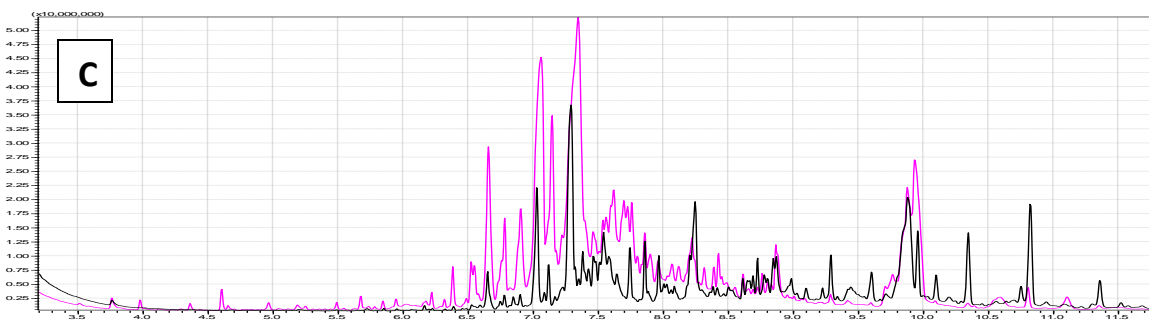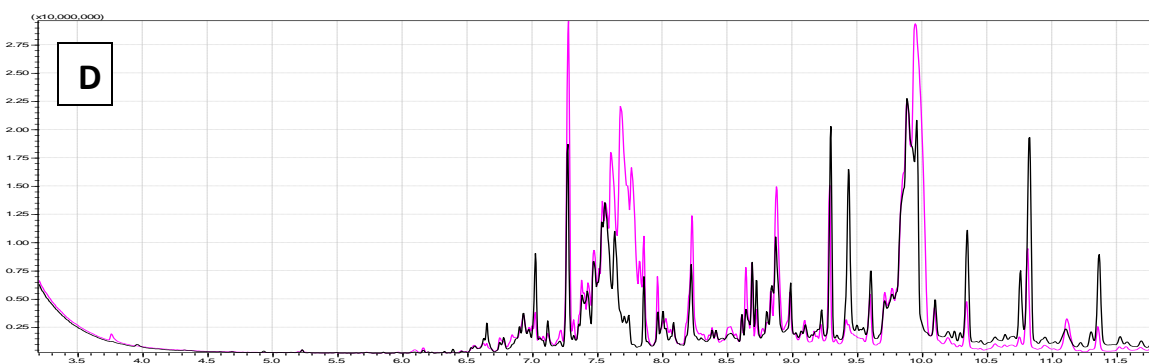

**Supplementary Figure 1. Chromatograms comparison for the plants at extra-water (black) and low-water (red) conditions. (A) Comparison of the plants roots. (B) Comparison of the plants stems. (C) Comparison of the plants leaves. (D) Comparison of the plants fruits.**

**Supplementary Table 1.** Comparative GC-MS analysis of *Cleome Amblyocarpa* plant growing either in extra-water or low-water conditions of the arid desert of Sharjah, UAE. Metabolite average relative percentage of three replicates was displayed  $\pm$  the standard error of the mean. The relative percentage of a metabolite represented in relation to total areas of all detected metabolites in an extract.

| Lipophilic Metabolites     | Extra-Water Condition |                 |                  |                  | Low-Water Condition |                 |                  |                  |
|----------------------------|-----------------------|-----------------|------------------|------------------|---------------------|-----------------|------------------|------------------|
|                            | Roots                 | Stems           | Leaves           | Fruits           | Roots               | Stems           | Leaves           | Fruits           |
| I- Tolerance               |                       |                 |                  |                  |                     |                 |                  |                  |
| Hexatriacontane            | 6.79 $\pm$ 0.6        | nd              | 12.24 $\pm$ 0.7  | 26.51 $\pm$ 0.19 | nd                  | 12.05 $\pm$ 0.5 | 5.52 $\pm$ 0.25  | 40.98 $\pm$ 0.85 |
| Tetracosane                | nd                    | nd              | nd               | 8.61 $\pm$ 0.35  | nd                  | nd              | nd               | 1.5 $\pm$ 0.09   |
| 1-Heptacosanol             | 9.56 $\pm$ 0.24       | nd              | nd               | nd               | 2.83 $\pm$ 0.4      | nd              | nd               | nd               |
| n-Nonadecanol-1            | 17.05 $\pm$ 0.4       | nd              | nd               | nd               | 12.54 $\pm$ 0.72    | nd              | nd               | nd               |
| n-Pentadecanol             | 6.08 $\pm$ 0.16       | nd              | nd               | nd               | nd                  | nd              | nd               | nd               |
| Phytol                     | 1.19 $\pm$ 0.16       | 1.48 $\pm$ 0.3  | 1.17 $\pm$ 0.06  | 1.07 $\pm$ 0.24  | 0.82 $\pm$ 0.06     | 1.65 $\pm$ 0.21 | nd               | 0.55 $\pm$ 0.21  |
| Tridecanal                 | nd                    | nd              | nd               | nd               | nd                  | 4.33 $\pm$ 0.18 | nd               | nd               |
| 9-Octadecenamide           | nd                    | nd              | nd               | 4.49 $\pm$ 0.17  | 5.18 $\pm$ 0.26     | nd              | nd               | nd               |
| Octacosyl acetate          | nd                    | 6.09 $\pm$ 0.27 | nd               | nd               | nd                  | nd              | nd               | nd               |
| Octadecanoic acid          | 5.3 $\pm$ 0.16        | 6.37 $\pm$ 0.14 | nd               | nd               | nd                  | nd              | nd               | nd               |
| Pentadecadien              | nd                    | nd              | nd               | nd               | nd                  | 3.35 $\pm$ 0.27 | nd               | nd               |
| II- Protective             |                       |                 |                  |                  |                     |                 |                  |                  |
| Heneicosane                | 3.38 $\pm$ 0.23       | nd              | nd               | 11.01 $\pm$ 0.26 | nd                  | nd              | nd               | nd               |
| Heptadecanal               | 7.32 $\pm$ 0.28       | nd              | nd               | nd               | 9.71 $\pm$ 0.27     | nd              | nd               | nd               |
| Tetratetracontane          | 1.92 $\pm$ 0.2        | nd              | 7.53 $\pm$ 0.64  | nd               | 9.51 $\pm$ 0.31     | nd              | 3.62 $\pm$ 0.06  | 1.26 $\pm$ 0.21  |
| Caryophyllene oxide        | nd                    | nd              | 4.65 $\pm$ 0.23  | nd               | nd                  | nd              | 13.85 $\pm$ 0.37 | nd               |
| Spiro[4.5]decane           | nd                    | nd              | nd               | nd               | nd                  | nd              | 5.41 $\pm$ 0.34  | nd               |
| 2,6,10-Dodecatriene        | nd                    | nd              | nd               | nd               | nd                  | nd              | 2.97 $\pm$ 0.28  | nd               |
| Pyran                      | nd                    | nd              | nd               | nd               | nd                  | 3.32 $\pm$ 0.21 | nd               | nd               |
| 2(1H)Naphthalenone         | nd                    | nd              | nd               | nd               | nd                  | nd              | 3.85 $\pm$ 0.05  | nd               |
| 1-Heptatriacotanol         | nd                    | nd              | nd               | nd               | nd                  | nd              | 5.81 $\pm$ 0.24  | nd               |
| Pentadecanoic acid         | nd                    | nd              | nd               | nd               | 6.23 $\pm$ 0.44     | nd              | nd               | nd               |
| Naphthalene                | nd                    | nd              | 1.15 $\pm$ 0.15  | nd               | nd                  | nd              | 3.71 $\pm$ 0.11  | nd               |
| III- Detoxification        |                       |                 |                  |                  |                     |                 |                  |                  |
| 2-Naphthalenemethanol      | nd                    | nd              | 10.73 $\pm$ 0.19 | 3.24 $\pm$ 0.7   | 9.56 $\pm$ 0.29     | nd              | 22.4 $\pm$ 0.57  | nd               |
| IV- Growth and Development |                       |                 |                  |                  |                     |                 |                  |                  |
| Squalene                   | 2.37 $\pm$ 0.06       | nd              | nd               | nd               | nd                  | nd              | nd               | nd               |
| Triacotanol (TRIA)         | nd                    | nd              | nd               | nd               | nd                  | nd              | nd               | 7.4 $\pm$ 0.52   |
| Triacetyl acetate          | 7.56 $\pm$ 0.24       | nd              | nd               | nd               | nd                  | nd              | nd               | nd               |
